# Supplementary material for: A Meloidogyne incognita effector MiISE5 suppresses programmed cell death to promote parasitism in host plant
Source: PubMed Central journal article supplement (PMC5940819; doi:10.1038/s41598-018-24999-4), 2018-05-08
Supplement: 41598_2018_24999_MOESM1_ESM.pdf [file 41598_2018_24999_MOESM1_ESM.pdf]

## Supplementary information

### ***A Meloidogyne incognita effector MiISE5 suppresses programmed cell death to promote parasitism in host plant***

Qianqian Shi<sup>a,b,#</sup>, Zhenchuan Mao<sup>a,#</sup>, Xi Zhang<sup>a,c#</sup>, Xiaoping Zhang<sup>a</sup>, Yunsheng Wang<sup>a</sup>, Jian Ling<sup>a</sup>, Runmao Lin<sup>a,c</sup>, Denghui Li<sup>a</sup>, Xincong Kang<sup>d</sup>, Wenxian Sun<sup>b</sup>, Bingyan Xie<sup>a,\*</sup>

<sup>a</sup>*Institute of Vegetables and Flowers, Chinese Academy of Agricultural Sciences, Beijing 100081, China*

<sup>b</sup>*Department of Plant Pathology and the Ministry of Agriculture Key Laboratory for Plant Pathology, China Agricultural University, Beijing 100193, China*

<sup>c</sup>*College of Life Science, Beijing Normal University, Beijing 100875, China*

<sup>d</sup>*Horticulture and Landscape College, Hunan Agricultural University, Changsha 410128, China*

**Authors:** #Qianqian Shi, #Zhenchuan Mao, #Xi Zhang are equal contributors;

Corresponding author:

\**E-mail address:* [xiebingyan@caas.cn](mailto:xiebingyan@caas.cn) (Bingyan Xie).

**Supplementary Table S1. The platforms about nematodes genome and transcripts of RKNs used in the homologue analysis of this study.**

| Species                           | Blast server links                                                                                                                                      |
|-----------------------------------|---------------------------------------------------------------------------------------------------------------------------------------------------------|
| <i>Meloidogyne incognita</i>      | <a href="https://www.ncbi.nlm.nih.gov/genome/?term=meloidogyne+incognita">https://www.ncbi.nlm.nih.gov/genome/?term=meloidogyne+incognita</a>           |
| <i>Meloidogyne hapla</i>          | <a href="https://www.ncbi.nlm.nih.gov/genome/?term=meloidogyne+hapla">https://www.ncbi.nlm.nih.gov/genome/?term=meloidogyne+hapla</a>                   |
| <i>Meloidogyne floridensis</i>    | <a href="https://www.ncbi.nlm.nih.gov/genome/?term=meloidogyne+floridensis">https://www.ncbi.nlm.nih.gov/genome/?term=meloidogyne+floridensis</a>       |
| <i>Meloidogyne javanica</i>       | From the transcriptional sequencing database of our lab                                                                                                 |
| <i>Globodera pallida</i>          | <a href="https://www.ncbi.nlm.nih.gov/genome/?term=Globodera+pallida">https://www.ncbi.nlm.nih.gov/genome/?term=Globodera+pallida</a>                   |
| <i>Globodera rostochiensis</i>    |                                                                                                                                                         |
| <i>Bursaphelenchus xylophilus</i> | <a href="https://www.ncbi.nlm.nih.gov/genome/?term=Bursaphelenchus+xylophilus">https://www.ncbi.nlm.nih.gov/genome/?term=Bursaphelenchus+xylophilus</a> |

**Supplementary Table S2. The number of homologues contain only zf\_C2H2 domain and homologues which contain both SP, zf\_C2H2 domain and have no transmembrane domain.**

| species                           | No of homologues contain<br>zf_C2H2 domain | No of homologues contain SP,<br>zf_C2H2 domain, and have no<br>transmembrane domain |
|-----------------------------------|--------------------------------------------|-------------------------------------------------------------------------------------|
| <i>Meloidogyne incognita</i>      | 86                                         | 21                                                                                  |
| <i>Meloidogyne hapla</i>          | 41                                         | 0                                                                                   |
| <i>Meloidogyne floridensis</i>    | 77                                         | 4                                                                                   |
| <i>Meloidogyne javanica</i>       | 82                                         | 0                                                                                   |
| <i>Globodera pallida</i>          | 74                                         | 2                                                                                   |
| <i>Globodera rostochiensis</i>    | 56                                         | 3                                                                                   |
| <i>Bursaphelenchus xylophilus</i> | 59                                         | 0                                                                                   |

**Supplementary Table S3. The corresponding Gene ID and gene information of the secreted homologs of MiISE5 in the Bayesian phylogenetic tree.**

| Gene name | Corresponding gene ID | No of<br>zf_C2H2<br>domain | Amino<br>acid<br>sequence<br>length | Organism                    |
|-----------|-----------------------|----------------------------|-------------------------------------|-----------------------------|
| Mi07211   | Minc07211             | 2                          | 406                                 | <i>Meloidogyne incognta</i> |
| Mi14286   | Minc14286             | 2                          | 421                                 | <i>Meloidogyne incognta</i> |
| Mi07210   | Minc07210             | 4                          | 422                                 | <i>Meloidogyne incognta</i> |
| Mi03794   | Minc03794             | 2                          | 400                                 | <i>Meloidogyne incognta</i> |
| Mi15572   | Minc15572             | 2                          | 345                                 | <i>Meloidogyne incognta</i> |
| Mi06247   | Minc06247             | 2                          | 368                                 | <i>Meloidogyne incognta</i> |
| Mi07208   | Minc07208             | 2                          | 435                                 | <i>Meloidogyne incognta</i> |
| Mi07207   | Minc07207             | 2                          | 481                                 | <i>Meloidogyne incognta</i> |
| Mi03790   | Minc03790             | 2                          | 503                                 | <i>Meloidogyne incognta</i> |
| Mi03795   | Minc03795             | 2                          | 245                                 | <i>Meloidogyne incognta</i> |
| Mi15570   | Minc15570             | 1                          | 387                                 | <i>Meloidogyne incognta</i> |
| Mi03791   | Minc03791             | 2                          | 222                                 | <i>Meloidogyne incognta</i> |
| Mi03784   | Minc03784             | 2                          | 227                                 | <i>Meloidogyne incognta</i> |
| Mi06248   | Minc06248             | 1                          | 404                                 | <i>Meloidogyne incognta</i> |
| Mi14282   | Minc14282             | 1                          | 211                                 | <i>Meloidogyne incognta</i> |
| Mi03905   | Minc03905             | 2                          | 242                                 | <i>Meloidogyne incognta</i> |
| Mi06064   | Minc06064             | 1                          | 180                                 | <i>Meloidogyne incognta</i> |
| Mi06060   | Minc06060             | 1                          | 326                                 | <i>Meloidogyne incognta</i> |
| Mi03597   | Minc03597             | 2                          | 434                                 | <i>Meloidogyne incognta</i> |
| Mi05885   | Minc05885             | 2                          | 430                                 | <i>Meloidogyne incognta</i> |

---

|          |                                                          |   |      |                                |
|----------|----------------------------------------------------------|---|------|--------------------------------|
| Mf05644  | maker-nMf.1.1.scaf05644<br>-augustus-gene-0.6-mRNA-1     | 2 | 315  | <i>Meloidogyne floridensis</i> |
| Mf03350  | maker-nMf.1.1.scaf03350<br>-augustus-gene-0.5-mRNA-1     | 1 | 324  | <i>Meloidogyne floridensis</i> |
| Mf01483  | genemark-nMf.1.1.scaf01483<br>-processed-gene-0.6-mRNA-1 | 2 | 1044 | <i>Meloidogyne floridensis</i> |
| Mf08808  | maker-nMf.1.1.scaf08808<br>-snap-gene-0.5-mRNA-1         | 2 | 276  | <i>Meloidogyne floridensis</i> |
| GR01291  | GROS_g01291.t1                                           | 2 | 344  | <i>Globodera rostochiensis</i> |
| GR08604  | GROS_g08604.t1                                           | 2 | 423  | <i>Globodera rostochiensis</i> |
| GR09339  | GROS_g09339.t1                                           | 1 | 827  | <i>Globodera rostochiensis</i> |
| G713500  | GPLIN_000713500                                          | 2 | 161  | <i>Globodera pallida</i>       |
| G1063600 | GPLIN_001063600                                          | 1 | 929  | <i>Globodera pallida</i>       |

---

**Supplementary Table S4. Primers used in this study (The lowercase regions represent the fusion sequence, the underlined regions represent cleavages sites of restriction enzymes).**

| Primers          | Sequence                              | Usage                                             |
|------------------|---------------------------------------|---------------------------------------------------|
| DIG_MiISE5_F     | ATGCTTTGTGGTCCAAGTG                   | <i>In situ</i> hybridization                      |
| DIG_MiISE5_R     | TTGTACTTTTTCTTTATGAATCTTC             |                                                   |
| TRV_MiISE5b_F    | tagaactagtgatccTTTATTTGTCGTTATTGCGGAC | RNA silence                                       |
| TRV_MiISE5b_R    | cggatcgataagcttATTTACTAGCATTTTTGCCTGG |                                                   |
| TRV_CP_F         | ACTCACGGGCTAACAGTGCT                  | Virus invasion detection                          |
| TRV_CP_R         | GACGTATCGGACCTCCACTC                  |                                                   |
| pEGAD_MiISE5_F   | CCGGAATTCATGCTTTGTGGTCCAAGTG          | <i>Arabidopsis</i> overexpression                 |
| pEGAD_MiISE5_R   | CGCGGATCCTTGACTTTTTCTTTATGAATCTTC     |                                                   |
| pEDV_MiISE5_F    | ACGCGTCGACATGCTTTGTGGTCCAAGTG         | Suppression of HR                                 |
| pEDV_MiISE5_R    | CGCGGATCC TTGTACTTTTTCTTTATGAATCTTC   |                                                   |
| pEDV_GFP_F       | ACGCGTCGACATGGTGAGCAAGGGCGAG          |                                                   |
| pEDV_GFP_R       | CGCGGATCCCTGTACAGCTCGTCCATGCC         |                                                   |
| pRGTN_MiISE5_F   | CCCAAGCTTATGACTATTATGAATGTTTTGCTC     | Validation of the functionality of signal peptide |
| pRGTN_MiISE5_R   | CGCGGATCCTCTTCAATTTACTAGCATTTTTG      |                                                   |
| pCAMBIA_MiISE5_F | CATGCCATGGATGCTTTGTGGTCCAAGTG         |                                                   |
| pCAMBIA_MiISE5_R | CTAGACTAGTTTGACTTTTTCTTTATGAATCTTC    | Subcellular localization                          |
| pCAMBIA_MiISE5_F | CATGCCATGGATGACTATTATGAATGTTTTGCTC    |                                                   |
| pCAMBIA_MiISE5_R | CTAGACTAGTTCTTCAATTTACTAGCATTTTTG     |                                                   |
| pGPK_MiISE5_F    | CATGCCATGGATGCTTTGTGGTCCAAGTG         | Yeast transcriptional activation assay            |
| pGPK_MiISE5_R    | CGCGGATCCTTGACTTTTTCTTTATGAATCTTC     |                                                   |
| qMiISE5_F2       | ATCGCCTCGCTTTCATTCTCC                 | q-PCR                                             |
| qMiISE5_R2       | TTGTAGTCTGGTTGGCTGGTG                 |                                                   |

---

|             |                                      |
|-------------|--------------------------------------|
| NbBAK1-F    | TACTTCGTTTATTGGGCTTTTGC              |
| NbBAK1-R    | GATCTGATTCTGGTCGCTCTCTT              |
| NbPAD4-F    | TGAGCTGTGCCATTCTCAAC                 |
| NbPAD4-R    | TCCTCGTAGAGCCACTCGAT                 |
| NbWRKY29-F  | TGGCTTCTTCTATTTCTTTTCCTA             |
| NbWRKY29-R  | ACTCTCTTCTGCTCATTCTTCCTT             |
| NbTP1-F     | ACTTTCGAATGCGATCCAAG <sup>[30]</sup> |
| NbTP1-R     | TCAACCACTTTGCTGCCATA <sup>[30]</sup> |
| AT1G17420-F | TGCTCAACACGCCGCTCT                   |
| AT1G17420-R | CCGATCTCTGCCGCAAATC                  |
| AT3G45970-F | TGTGCTTATGGCTCTATGGCTAC              |
| AT3G45970-R | AAGGACAAGATCGGTTTGGTTAC              |
| AT2G34600-F | CGGTAACGGTGGTAAGGGG                  |
| AT2G34600-R | CGGTAACGGTGGTAAGGGG                  |
| AT1G17380-F | TTCCCTCCATCGATTCTTTGC                |
| AT1G17380-R | CGGTCTTTGTGACGACTGTCCT               |
| AT5G13220-F | CGTTCGGTTCGGTCTACTCC                 |
| AT5G13220-R | GCTGCTTCATTAGCGACCTTC                |
| AT1G72520-F | ATTTTGGCTGAGGACTTCGCT                |
| AT1G72520-R | ACTCGTTCTATGTTGACCGGG                |
| AT3G48520-F | CTGAACCGGGGAGTACACGAC                |
| AT3G48520-R | ACCTTAAGCCCACCAGCCATA                |
| AT2G27690-F | GTCGGGATACGGTAGCTGCTG                |
| AT2G27690-R | GCGAATTTGGAATCGAATTGA                |
| AT5G45340-F | CTCCGGTTTGTCTCACTCTCT                |
| AT5G45340-R | TCCGTATCTTCTGTTTTGCTG                |

---

---

|             |                          |
|-------------|--------------------------|
| AT1G80840-F | GTTATTGGCGGAGTGTCCGAG    |
| AT1G80840-R | GGAGACAAGCACATTTGAAGT    |
| AT5G49520-F | TTCATTCGATGCCTTTCCTCTC   |
| AT5G49520-R | TGGCTTAGTACCCTTTTGCTCTT  |
| AT4G31800-F | GGAGGTCTCAGTTTTGGCTTCT   |
| AT4G31800-R | CGGTATATCGGTCTGCTCGATT   |
| AT4G23810-F | ACAAGACACCAGAGTCAAACCAGC |
| AT4G23810-R | ACAACGTCTGAAGATCGGAGAAC  |
| AT5G62520-F | AGAGGCGGTGCAGATGAAAC     |
| AT5G62520-R | AGATACAATCCACGGCCAAAAG   |
| AT2G22500-F | AGGGTTTTGCTGAAGGAGGAATAG |
| AT2G22500-R | ACAGAGTTTGACGAAGAACGGTG  |
| AT4G17490-F | GGAAGTGACGGTGGTTGAGAA    |
| AT4G17490-R | CAAACGGTGGGTGTGGAGATA    |
| AT5G03720-F | ACTTCAAGCGATCCAAAAGGC    |
| AT5G03720-R | CCCAGCAGACATCAGGCAAAC    |
| AT1G76650-F | CCGGAGAGATAACAACAATAACA  |
| AT1G76650-R | GAGAAAATTCCTCAAAATCCAACA |
| AT1G73805-F | GCGAAAGTTGCGAAAGGGAG     |
| AT1G73805-R | TTGATGTGGCGAGAGGAGAGC    |
| AT1G66400-F | TAGGAGCTCTCTCCTCAAACGC   |
| AT1G66400-R | CAACCATCACCATCAGAATCAA   |
| AT2G41010-F | ATGGTGACTTCGGAGGGATTAG   |
| AT2G41010-R | GGAGTGAGAGTATGAGGGGCTG   |
| AT4G08040-F | TCATGGGGAAAATCAGAGAGAAC  |
| AT4G08040-R | CAAACCCTGGATAATAAGGTGCA  |

---



---

|             |                           |
|-------------|---------------------------|
| AT3G50930-F | CTTCACTCTCTCCCCAGAAAACA   |
| AT3G50930-R | TGGACCGTACAGCAAGTAACCTC   |
| AT5G03350-F | CTTTGGTCCACTCCAGTCCCT     |
| AT5G03350-R | TGTTGGTTTTGTTGAATATCCCG   |
| AT5G26920-F | TTACAATGCAAACACTCCGGG     |
| AT5G26920-R | TGAAAGTCGATGTGCTGCGAT     |
| AT3G59080-F | AAATATGATGTTTCGGTTGCGGT   |
| AT3G59080-R | GAAGTGAAGTTCAGATTCGGGTG   |
| AT3G23250-F | AAAGAACCCACCAAGGAACGG     |
| AT3G23250-R | TACCAGACTCAAGTGTGCCACC    |
| AT3G50060-F | TCGTCTCCTGTTGCTCAGCTG     |
| AT3G50060-R | CGCGTTGTTGTTATTGTTATGGC   |
| AT5G62470-F | AAGCACTAACAAAGGTCAATGGG   |
| AT5G62470-R | TGGTGTCGGTAATGATGAAGATG   |
| AT2G30020-F | AACCTCAGACCTCTTCTCCTTCC   |
| AT2G30020-R | ACCATCACCTTCTCTCTCAACCT   |
| AT4G24380-F | AAACTCTCTCCCTCCACTTTTTAGG |
| AT4G24380-R | TTCACCATTCTTGTCTTCCTCCAT  |
| AT3G22231-F | GGCCGTACACAAGTCCGC        |
| AT3G22231-R | GCCGCAGCAGAAGATACTC       |
| AT5G61600-F | AGGCCCTAGAACCATCACCAA     |
| AT5G61600-R | CCAAGCCAGATCCTACAACCC     |
| AT1G20823-F | CTTGGTTGTTGCCAGGTGTCA     |
| AT1G20823-R | CATCTTCGCCTTGCTTGATTC     |
| AT2G35930-F | GAACCACGGAGCAGCCATAG      |
| AT2G35930-R | ACCTTCCCACCGACAACAAAA     |

---

---

|             |                                        |                                     |
|-------------|----------------------------------------|-------------------------------------|
| AT4G03510-F | TCTGTGGTCACCTCTTTTGCTG                 |                                     |
| AT4G03510-R | AACCGGTCCTACGGGTCTTTTA                 |                                     |
| AT1G66090-F | TCTGTGGTCACCTCTTTTGCTG                 |                                     |
| AT1G66090-R | AACCGGTCCTACGGGTCTTT                   |                                     |
| AT1G72940-F | TTCGCCGTCGTTGTTGTCTC                   |                                     |
| AT1G72940-R | GATCTTCTTCTCTAGCCTCGTGC                |                                     |
| actin2-F    | TTGACAGAGAAGAACAAGGAAGAA               | q-PCR ( <i>Arabidopsis</i> control) |
| actin2-R    | GGAAGAAGATGAGATTGAGGAAGA               |                                     |
| NbActin-F   | CGGAATCCACGAGACTACATAC <sup>[30]</sup> | q_PCR( <i>Nicotiana</i> control)    |
| NbActin-R   | GGGAAGCCAAGATAGAGC <sup>[30]</sup>     |                                     |
| 18S_F       | ACCGTGGCCAGACAAACTAC                   | q-PCR ( <i>Meloidogyne</i> control) |
| 18S_R       | GATCGCTAGTTGGCATCGTT                   |                                     |

---

**Supplementary Table S5. List of defense response genes that was differentially expressed in the *MiISE5* transgenic plants and the WT plants (FDR ≤ 0.05).**

| Gene ID   | Symbol  | Gene annotation                                 | logFC    | FDR         |
|-----------|---------|-------------------------------------------------|----------|-------------|
| AT5G49520 | WRKY48  | Probable WRKY transcription factor 48           | 3.19785  | 0.000000278 |
| AT1G80840 | WRKY40  | Probable WRKY transcription factor 40           | 3.334907 | 2.57E-08    |
| AT3G49530 | NAC062  | NAC domain-containing protein 62                | 2.519999 | 0.0000649   |
| AT4G12720 | ATNUDT7 | Nudix hydrolase 7                               | 2.135306 | 0.001108    |
| AT2G39200 | MLO12   | MLO-like protein                                | 2.12877  | 0.004353    |
| AT2G33580 | LYK5    | Protein LYK5                                    | 2.368327 | 0.000288    |
| AT3G20600 | NDR1    | Protein NDR1                                    | 2.568809 | 0.00015     |
| AT2G30020 | AP2C1   | PP2C-type phosphatase AP2C1                     | 3.583276 | 4.11E-09    |
| AT1G17420 | LOX3    | Lipoxygenase 3, chloroplastic                   | 5.308424 | 6.41E-17    |
| AT3G44260 | CAF1-9  | Probable CCR4-associated factor 1 homolog 9     | 4.056785 | 2.14E-11    |
| AT1G52030 | F-ATMBP | Myrosinase-binding protein 2                    | -2.09237 | 0.004186    |
| AT3G25250 | OXI1    | Serine/threonine-protein kinase OXI1            | 2.185146 | 0.004087    |
| AT1G74950 | JAZ1    | Jasmonate-zim-domain protein 1                  | 1.928403 | 0.004603    |
| AT5G64900 | PEP1    | Elicitor peptide 1                              | 2.553458 | 0.002079    |
| AT5G52020 | ERF025  | Ethylene-responsive transcription factor ERF025 | 4.077205 | 7.66E-09    |
| AT5G66210 | CPK28   | Calcium-dependent protein kinase 28             | 2.313317 | 0.000253    |
| AT2G40140 | CZF1    | Zinc finger CCCH domain-containing protein 29   | 2.200878 | 0.000641    |
| AT5G37770 | CML24   | Calcium-binding protein CML24                   | 3.592686 | 2.65E-09    |
| AT1G17380 | JAZ5    | Jasmonate-zim-domain protein 5                  | 3.908654 | 8.01E-10    |
| AT2G15890 | MEE14   | CCG-binding protein 1                           | -2.06052 | 0.001987    |
| AT1G20823 | ATL80   | RING-H2 finger protein ATL80                    | 3.286885 | 0.000000154 |
| AT5G20230 | BCB     | blue-copper-binding protein                     | 2.206003 | 0.000577    |
| AT5G24590 | NAC091  | NAC domain-containing protein 91                | 1.97724  | 0.003648    |
| AT5G13220 | JAZ10   | Jasmonate-zim-domain protein 10                 | 3.142519 | 0.000000613 |

---

|           |         |                                                                |          |             |
|-----------|---------|----------------------------------------------------------------|----------|-------------|
| AT3G61190 | BAP1    | BON1-associated protein 1                                      | 4.48735  | 3.23E-11    |
| AT2G27080 | NHL13   | NDR1/HIN1-like protein 13                                      | 4.154048 | 1.19E-11    |
| AT3G15210 | ERF4    | Ethylene-responsive transcription factor 4                     | 1.991583 | 0.003116    |
| AT1G19180 | JAZ5    | TIFY10A                                                        | 2.668486 | 0.0000105   |
| AT4G31800 | WRKY18  | WRKY like transcription factor                                 | 2.974197 | 0.000000782 |
| AT4G17490 | ERF6    | Ethylene-responsive transcription factor 6                     | 3.017079 | 0.000000924 |
| AT2G34600 | JAZ7    | Jasmonate-zim-domain protein 7                                 | 5.073347 | 6.45E-14    |
| AT2G35930 | PUB23   | E3 ubiquitin-protein ligase PUB23                              | 2.713218 | 0.0000253   |
| AT3G48520 | CYP94B3 | CYP94B3                                                        | 5.197636 | 6.45E-14    |
| AT5G61600 | ERF104  | Ethylene-responsive transcription factor ERF104                | 2.09478  | 0.001673    |
| AT1G29690 | CAD1    | MACPF domain-containing protein CAD1                           | 1.874435 | 0.007796    |
| AT5G66070 | N/A     | RING/U-box superfamily protein                                 | 2.097592 | 0.002378    |
| AT3G22231 | PCC1    | Cysteine-rich and transmembrane domain-containing protein PCC1 | 3.233834 | 0.00000062  |
| AT1G72520 | LOX4    | Lipoxygenase 4, chloroplastic                                  | 3.533435 | 3.61E-09    |

---

**Supplementary Table S6. The significantly enriched KEGG terms of DEGs(P ≤0.05).**

| Items_Details                      | ID       | Number of genes | P-value  | Genes                                                           |
|------------------------------------|----------|-----------------|----------|-----------------------------------------------------------------|
| Plant-pathogen interaction         | ath04626 | 10              | 7.46E-06 | WRKY33,WRKY40,WRKY18,WRKY48,CML5, CML38,CML23,CML16,CML24,CPK28 |
| Plant hormone signal transduction  | ath04075 | 6               | 0.047    | JAZ5, JAZ10, XTH22, ARR7,JAZ7,JAZ1                              |
| alpha-Linolenic acid metabolism    | ath00592 | 5               | 4.04E-05 | LOX3,LOX4, OPR3, 4CLL5,AOC3                                     |
| Linoleic acid metabolism           | ath00591 | 2               | 0.004    | LOX3,LOX4                                                       |
| Taurine and hypotaurine metabolism | ath00430 | 2               | 0.009    | PCO1,PCO2                                                       |

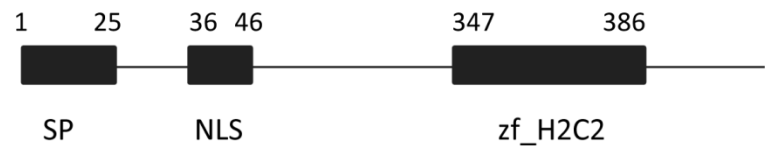

**Supplementary Figure 1. Schematic diagram of the protein structure of MiISE5.**

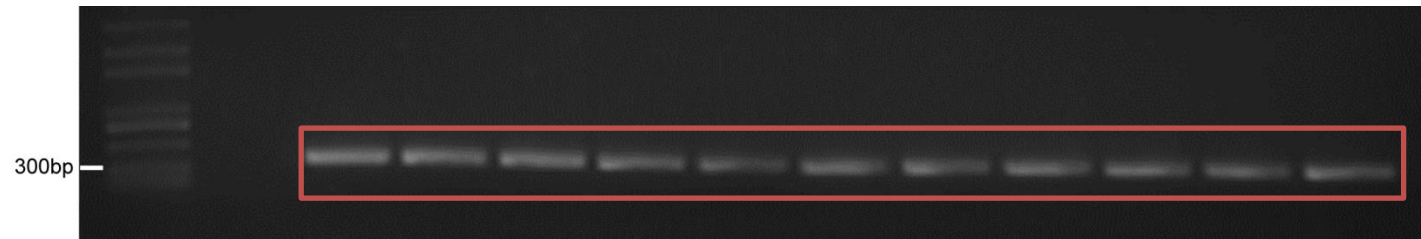

**Supplementary Figure 2. Checking of transcripts of coat protein (cp) gene by Reverse transcription PCR.**

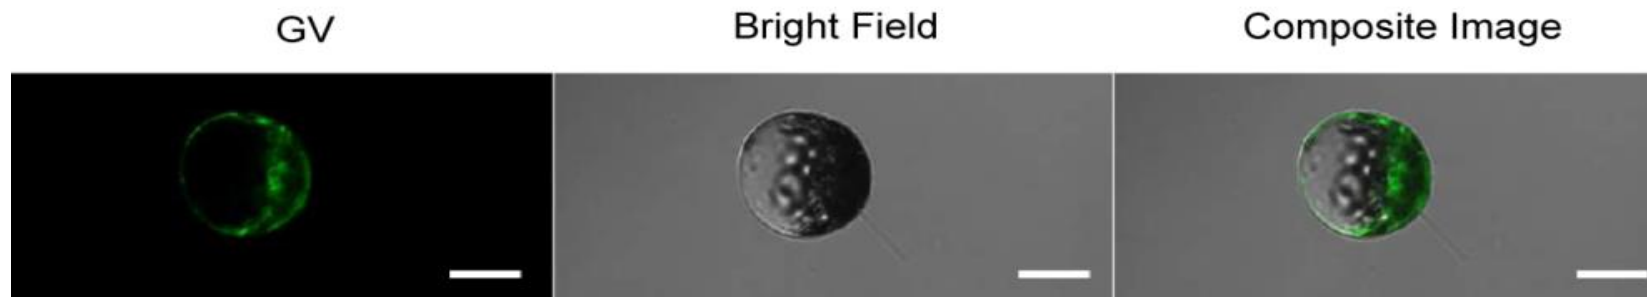

Supplementary Figure 3. Subcellular localization of transiently expressed MiISE5:GFP in Arabidopsis protoplasts. The MiISE5 was localized in the cytoplasm.



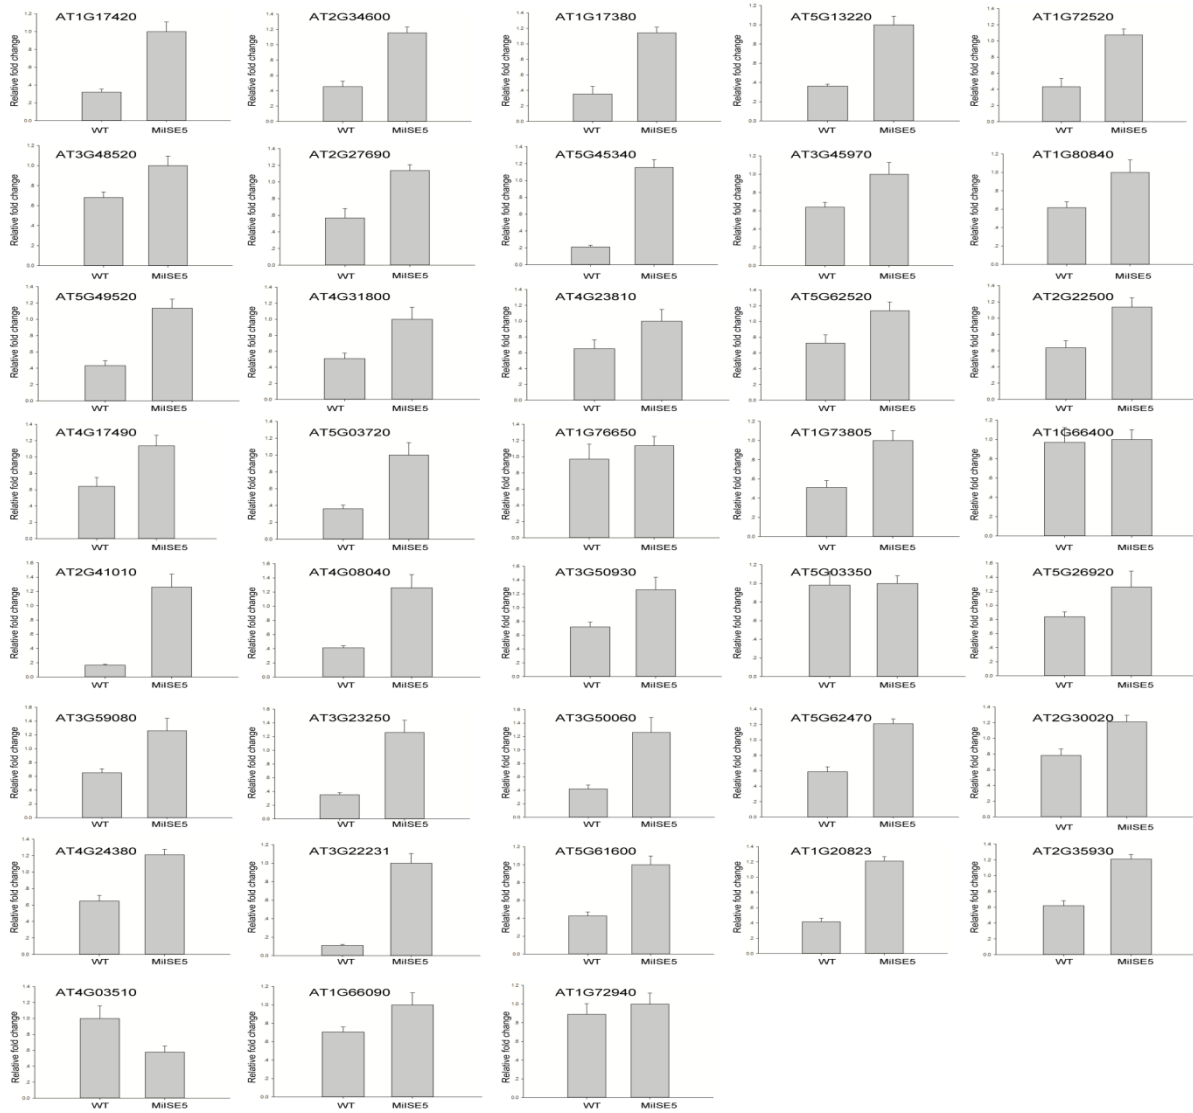

**Supplementary Figure 4. Verification of gene expression patterns in WT and *MiSE5* overexpression *Arabidopsis*. 38 DEGs were selected to validate the reliability of the RNA-seq results. The experiments were performed three times with similar results. Actin2 (AT3G18780) was used as internal control gene to normalize the expression of the genes in each corresponding q-PCR sample.**

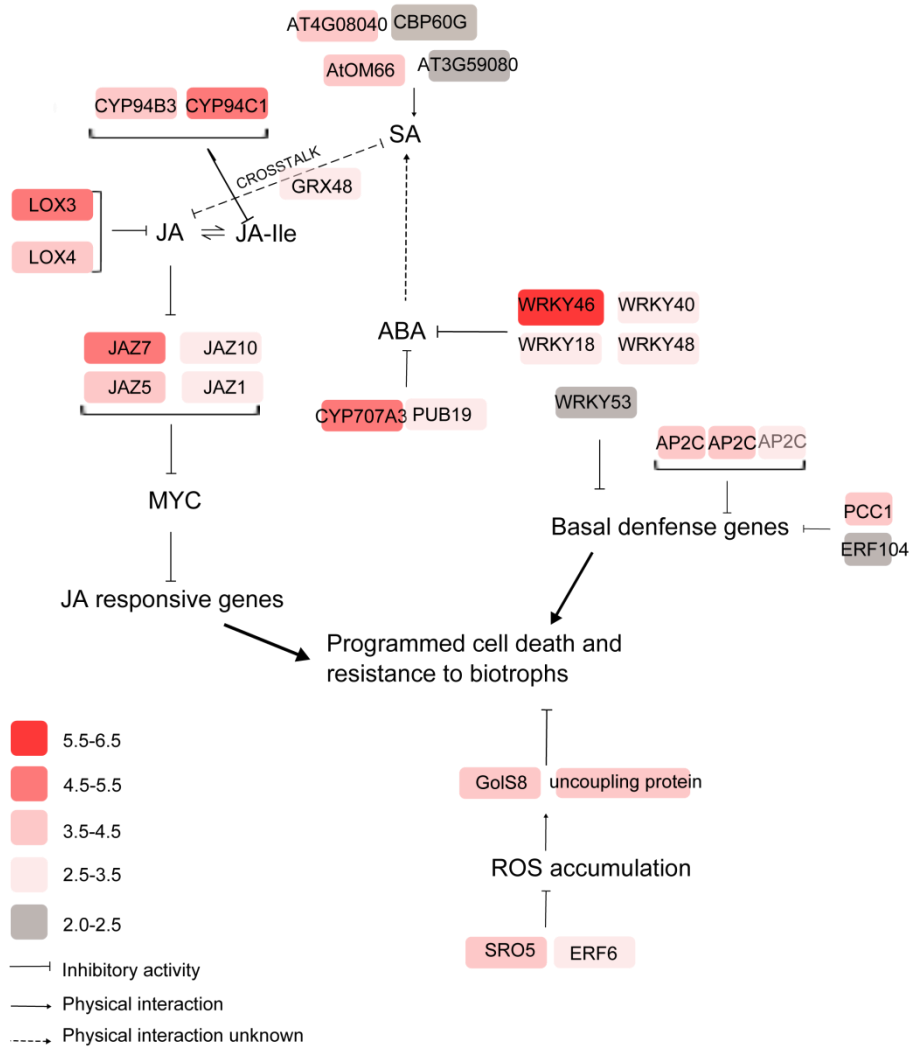

**Supplementary Figure 5. Potential DEGs involved in host defense responses. The color bar represents the expression level ( $\log_2FC$ ) of DEGs.**

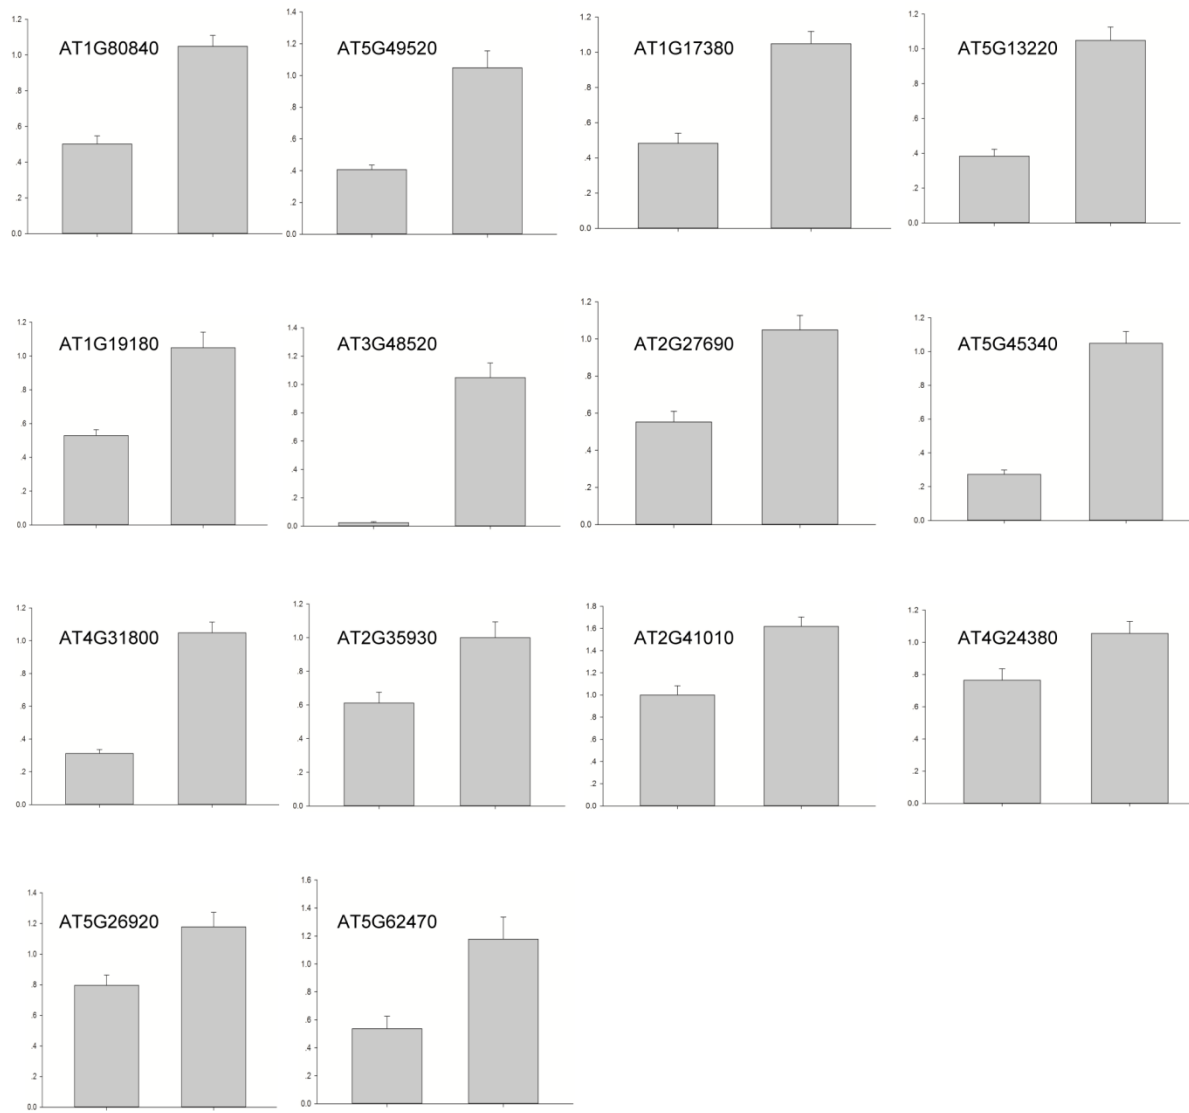

**Supplementary Figure 6. Verification of gene expression patterns in WT and MiISE5 overexpression Arabidopsis T\_5 line. 14 DEGs were selected to validate the reliability of the RNA-seq results. The experiments were performed three times with similar results. Actin2 (AT3G18780) was used as internal control gene to normalize the expression of the genes in each corresponding q-PCR sample.**
